# Supplementary material for: Treatment of non-traumatic avascular necrosis of the femoral head (Review)
Source: PubMed Central journal article supplement — Exp Ther Med. 2022 Mar 10;23(5):321. doi: 10.3892/etm.2022.11250 (PMC8972838; doi:10.3892/etm.2022.11250), 2022-03-10

Figure S1. Flowchart for the treatment of NONFH. NONFH, non-traumatic osteonecrosis of the femoral head.

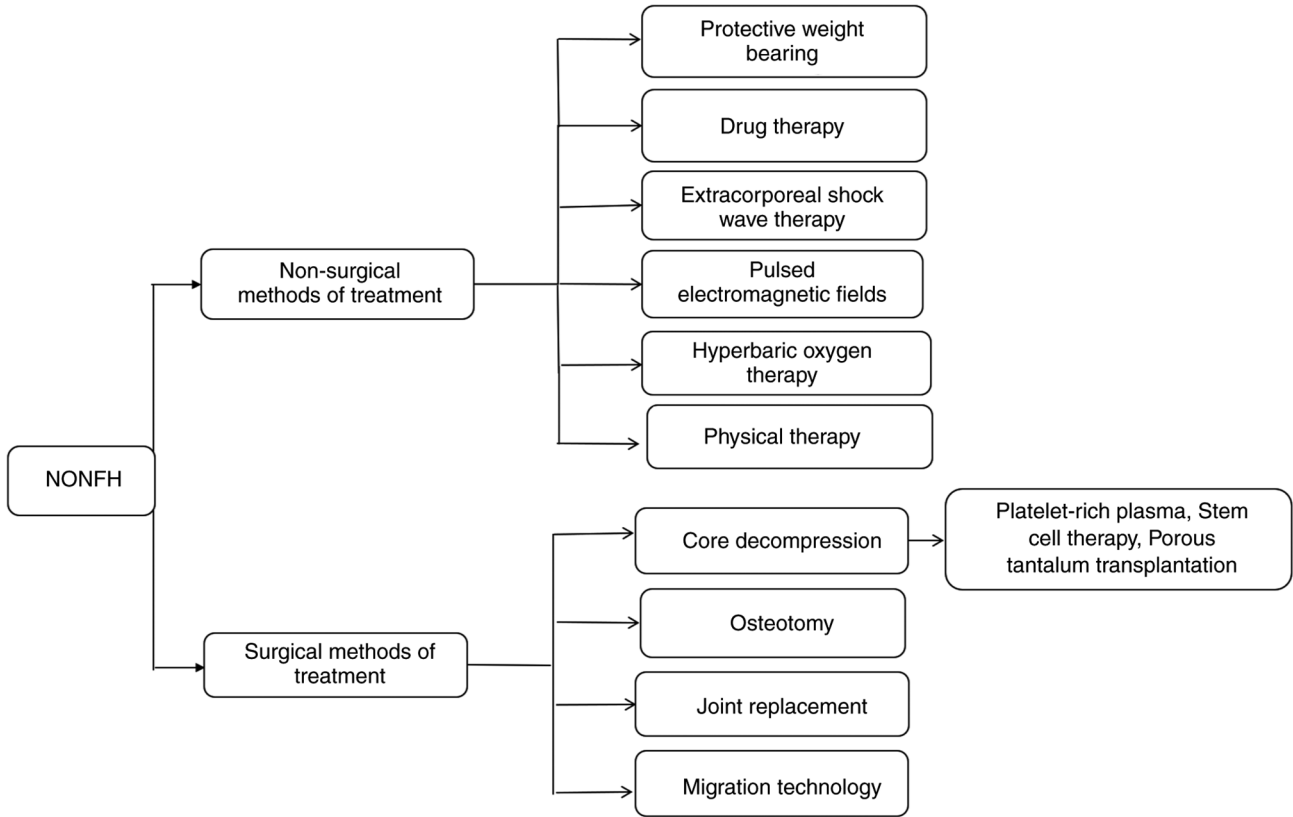

Supplement: Supplementary_Data.pdf [file Supplementary_Data.pdf]
